# Supplementary material for: Preparation of a novel regenerated silk fibroin-based hydrogel for extrusion bioprinting
Source: Royal Society of Chemistry journal article supplement (doi:10.1039/d2sm00984f), 2022-01-01
Supplement: d2sm00984f1.pdf [file d2sm00984f1.pdf]

## ***Supporting Information***

### The preparation of a novel regenerated silk fibroin-based hydrogel for extrusion bioprinting

Ni Chen<sup>a</sup>, Xinbo Zhang<sup>b</sup>, Jinyang Lyu<sup>c</sup>, Guanglei Zhao<sup>c</sup>, Kai Gu<sup>a</sup>, Jun Xia<sup>c</sup>, Zhongchun  
Chen<sup>d</sup>, Zhengzhong Shao<sup>a\*</sup>

\*: Corresponding author. E-mail: zzshao@fudan.edu.cn

a: State Key Laboratory of Molecular Engineering of Polymers, Laboratory of  
Advanced Materials and Department of Macromolecular Science, Fudan  
University, Shanghai 200433, P.R.China.

b: Department of Materials Science and Engineering, Southern University of  
Science and Technology, Shenzhen, Guangdong 518055, P.R.China.

c: Department of Orthopedic Surgery, Huashan Hospital, Fudan University,  
Shanghai 200040, P.R.China.

d: Department of Otorhinolaryngology-Head and Neck Surgery, Huashan  
Hospital, Fudan University, Shanghai 200040, P.R.China.

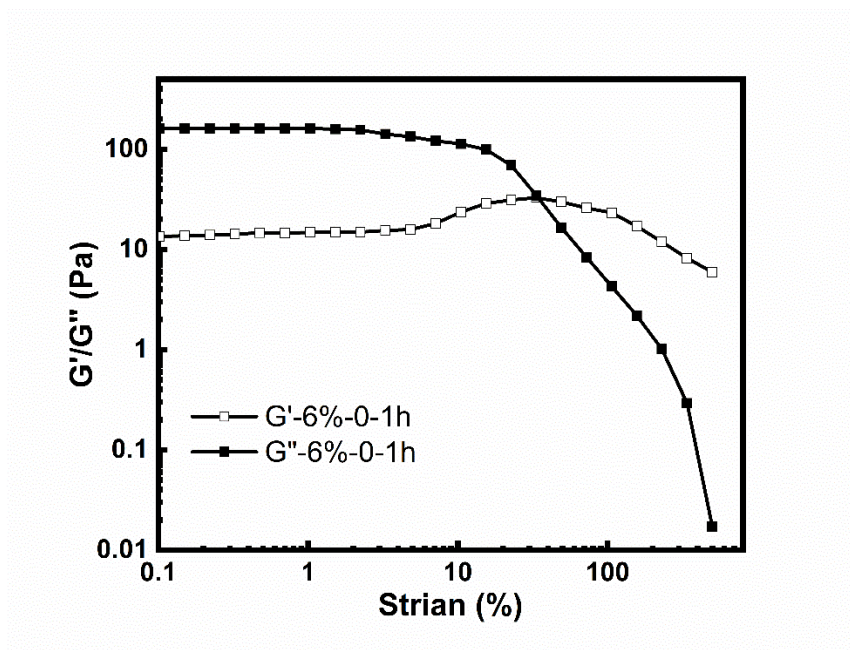

Figure S1. Strain sweep of the 6%-0-1h HMWRSF-based precure hydrogel with the lowest G' modulus value among all precure hydrogels.

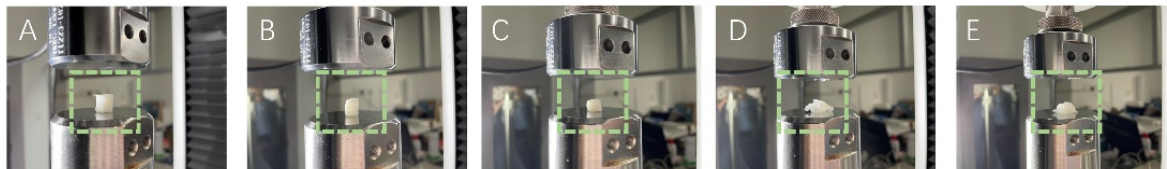

Figure S2. Digital images of 3D-printed RSF/HPMC scaffolds after experiencing 50% compressive strain. A.r-6%-0-2h, B.r-8%-0.5-1h, C.r-10%-1.0-1h, D.r-L-8%-0-1h, E. r-L-10%-0-1h.

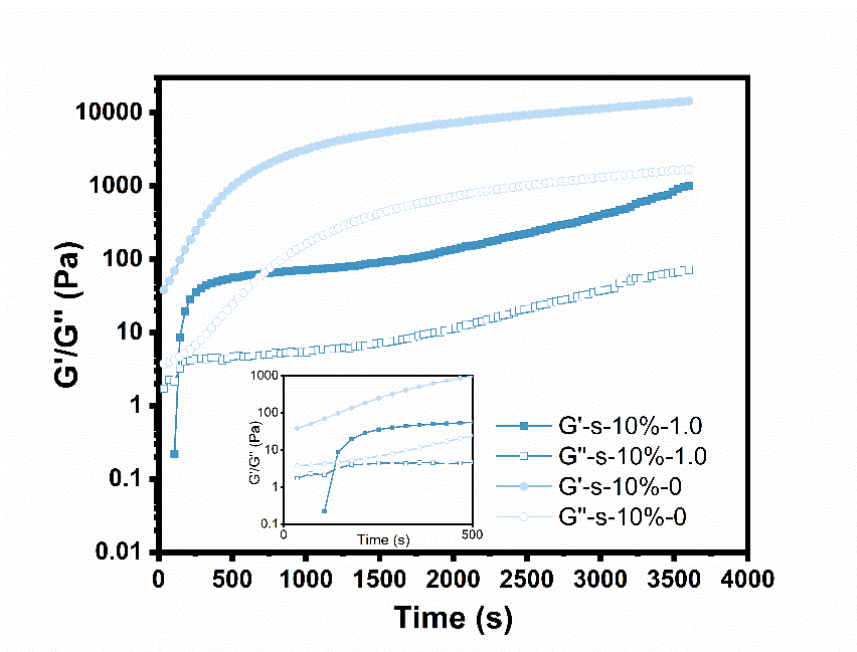

Figure S3. Evaluation of  $G'$  and  $G''$  in gelation process of the s-10%-1.0 and s-10%-0 upon heating at 70°C. inset: first 500s of gelation process.

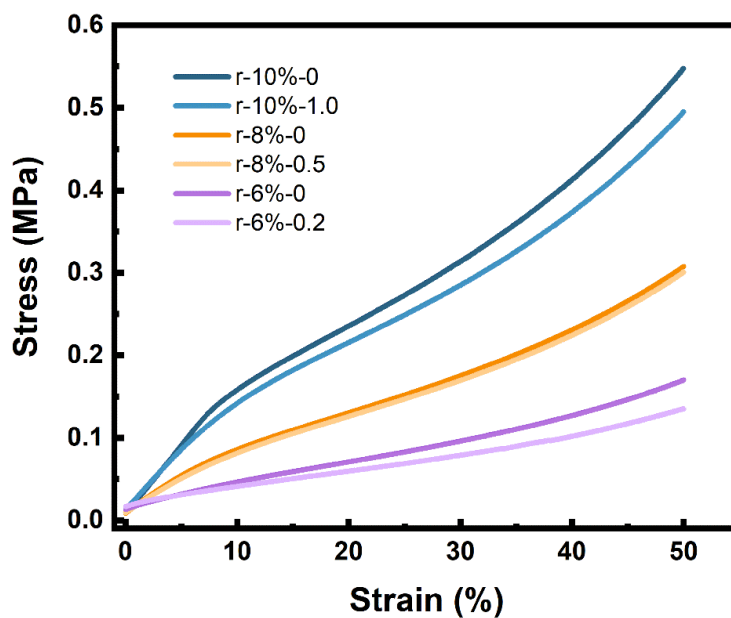

Figure S4. Stress-strain curves of RSF/HPMC hydrogels of different solid content and urea content.

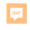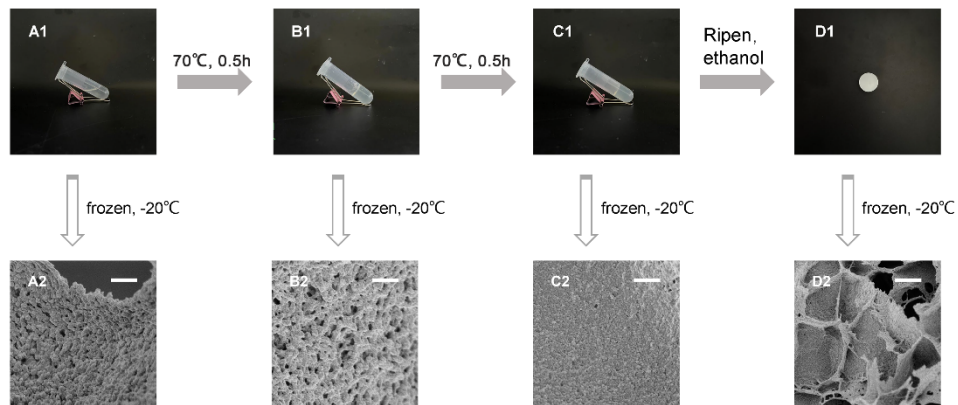

Figure S5. Digital images of 8% -0.5 HMWRSF/HPMC-urea aqueous solution and its produced hydrogels at different stages (A1-D1). SEM images of the cross section of those corresponded samples after lyophilization (A2-D2). 8% means the solid content in the solution and 0.5 means the weight ratio of urea to HMWRSF. The weight ratio of HMWRSF to HPMC is 9:1. Scale bar is 500 nm.

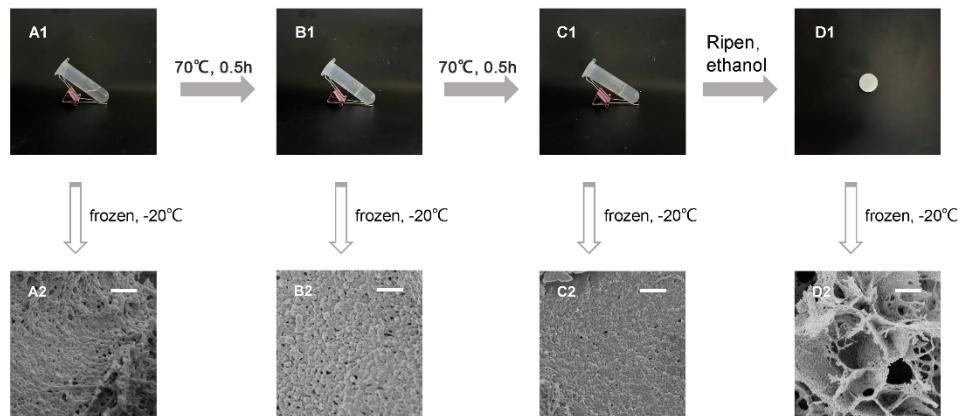

Figure S6. Digital images of 10% -1.5 HMWRSF/HPMC-urea aqueous solution and its produced hydrogels at different stages (A1-D1). SEM images of the cross section of those corresponded samples after lyophilization (A2-D2). 10 % means the solid content in the solution and 1.0 means the weight ratio of urea to HMWRSF. The weight ratio of HMWRSF to HPMC is 9:1. Scale bar is 500 nm.

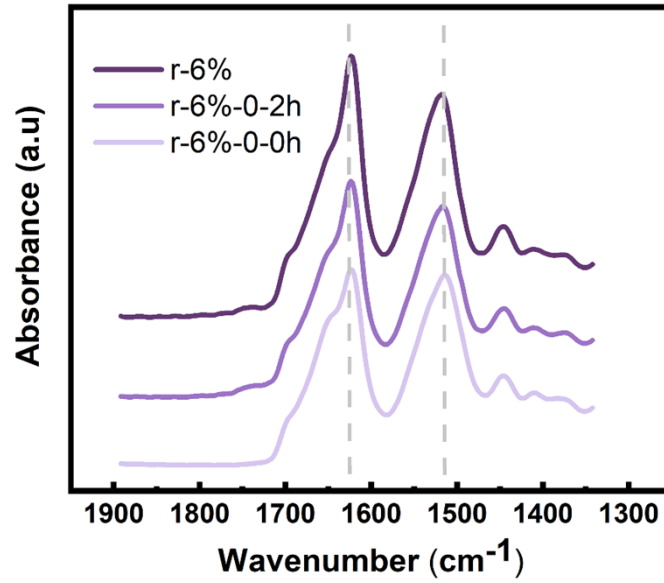

Figure S7. ATR-FTIR characterization of the samples lyophilized from HMWRSF/HPMC solution (r-6%-0-0h), precure HMWRSF/HPMC hydrogel (r-6%-0-2h), and ripened HMWRSF/HPMC hydrogel (r-6%).

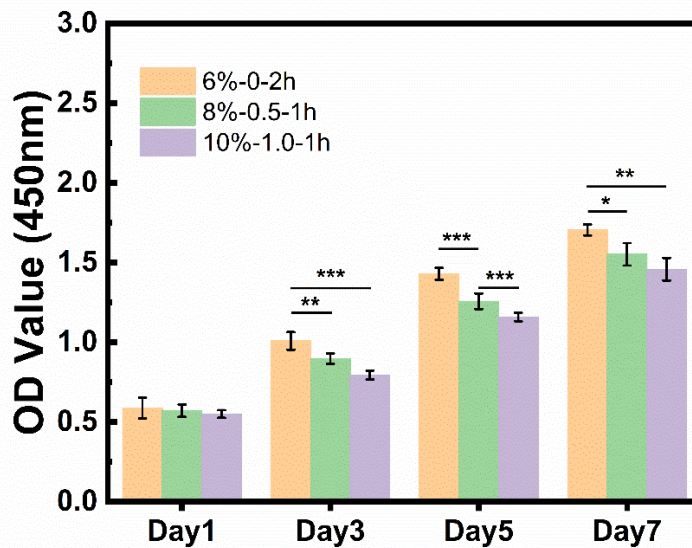

Figure S8. The proliferation of dental pulp mesenchymal stem cells (DPSCs) on 3D-biprinted HMWRSF-based scaffolds evaluated by cell counting kit-8 (CCK-8).

Table S1. Solid content and compression modulus of different RSF/HPMC hydrogels (n=5).  $W_a$ : the actual solid content.

| Samples   | $W_a$ (wt%) | Compressive modulus (MPa) |
|-----------|-------------|---------------------------|
| r-10%-0   | 12.7±0.2    | 1.6±0.2                   |
| r-10%-1.0 | 11.9±0.3    | 1.5±0.2                   |
| r-8%-0    | 9.7±0.2     | 0.95±0.02                 |
| r-8%-0.5  | 9.3±0.3     | 0.84±0.08                 |
| r-6%-0    | 7.2±0.2     | 0.35±0.03                 |
| r-6%-0.2  | 6.8±0.2     | 0.28±0.05                 |
